# Supplementary material
Source: Springer Nature journal article supplement (https://www.springermedizin.de/resource/supplementary/13256_2008_359_MOESM2_ESM.pdf/9645812)

a

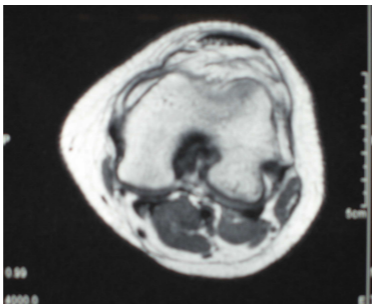

b

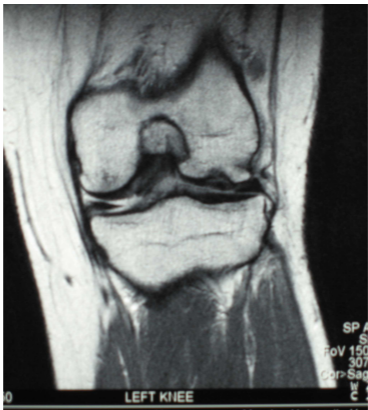

c

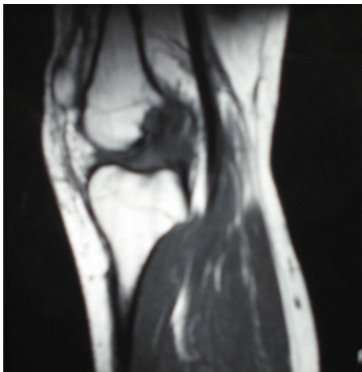

Supplement: MOESM2 [file 9645812]
